# Supplementary material
Source: PubMed Central journal article supplement (PMC10559046)
Supplement: NIHMS1933001-supplement-supplement.pdf [file NIHMS1933001-supplement-supplement.pdf]

## Supplementary Appendix

Supplement to: Titanji BK, Eick-Cost A, Partan ES, et al. Effectiveness of smallpox vaccination to prevent mpox in military personnel. *N Engl J Med* 2023;389:1147-8. DOI: 10.1056/NEJMc2300805

This appendix has been provided by the authors to give readers additional information about the work.

## Table of Contents

|                                                                                                                                        |           |
|----------------------------------------------------------------------------------------------------------------------------------------|-----------|
| <b>1.SUPPLEMENTARY DISCUSSION .....</b>                                                                                                | <b>2</b>  |
| <b>2. STUDY PLAN AND DESIGN - EFFECTIVENESS OF ACAM2000® AND DRYVAX® FOR PREVENTING MONKEYPOX AMONG THE VA AND DOD POPULATION.....</b> | <b>4</b>  |
| A) RATIONALE .....                                                                                                                     | 4         |
| B) HYPOTHESIS .....                                                                                                                    | 4         |
| C) STUDY POPULATION .....                                                                                                              | 4         |
| D) STUDY DESIGN AND STATISTICAL ANALYSIS PLAN .....                                                                                    | 5         |
| <b>3. SUPPLEMENTARY TABLES .....</b>                                                                                                   | <b>7</b>  |
| <b>4. SUPPLEMENTARY FIGURES .....</b>                                                                                                  | <b>14</b> |
| <b>5. REFERENCES .....</b>                                                                                                             | <b>15</b> |

## 1. Supplementary Discussion

In this study, prior vaccination with a first (Dryvax®) or second (ACAM2000®) generation smallpox vaccine was effective in preventing mpox among military personnel and Veterans with an estimated vaccine effectiveness (VE) of 74% and 66% respectively. This is the first and largest real-world study estimating the effectiveness of older generation smallpox vaccines against mpox, including individuals with a more remote vaccination history.

Surveillance data from a historical outbreak in the Democratic Republic of Congo estimated a protective effect (85% risk reduction) of prior smallpox vaccination with Dryvax® against mpox, among household contacts of individuals with the disease(1, 2). This report was limited by a small sample size and likely does not reflect the level of protection conferred by updated smallpox vaccines. In contrast, our study evaluated the effectiveness of smallpox vaccination received between 2002-2017, which is within 20 years of the current outbreak. Comparatively, our effectiveness estimates are lower, suggesting differences in the level of protection conferred likely exist, based upon the vaccine formulation used or time since vaccination. Furthermore, the role of mucosal transmission in the current mpox outbreak may differentially modulate the effectiveness of vaccines administered by subcutaneous and intradermal routes. Understanding how novel modes of transmission impact the efficacy of available vaccines requires investigation.

The odds of testing positive for mpox decreased with increasing age in our cohort, independent of documented smallpox vaccination. This mirrors patterns observed with other sexually transmissible infections such as gonorrhea, chlamydia, and syphilis and likely reflects changes in sexual behavior patterns that may occur with older age(3).

It is important to highlight that protection against mpox conferred by previous smallpox vaccination is not absolute, and vaccines need to be combined with other infection prevention strategies. While vaccine-induced immune responses following Dryvax® or ACAM2000® vaccination may provide durable protection against mpox, a subset of individuals, yet to be defined, may benefit from subsequent booster doses to optimize this protection. Current CDC guidance recommends a booster for individuals with continued exposure to *Orthopoxviruses* two-years after a primary series of JYNNEOS® vaccine and three-years after the single dose of

ACAM2000®(4). The need for booster doses of vaccine and the timing of these for mpox remains to be determined.

In our cohort, HIV diagnosis and Male sex were associated with an increased likelihood for acquiring mpox. In the US 98% of mpox cases are in men who have sex with men, and 38% have concomitant infection with HIV(5). Black and Hispanic ethnicities were associated with increased odds for mpox. Similar observations have been made in other studies, highlighting emerging disparities in the burden of mpox among people with HIV and individuals from racial and ethnic minority groups in the US. These emerging risk associations should be considered in prioritizing access to prevention tools against mpox for military personnel.

*Limitations* - The retrospective test-negative, non-randomized design increases the potential for selection bias i.e., individuals who sought care and testing may have different characteristics from those who did not seek care for their symptoms. This could potentially affect the accuracy of VE estimates based only on individuals who were tested for orthopoxvirus. Individuals diagnosed with HIV prior to separation from the military may have been less likely to be vaccinated in the military because of their restriction from deployment and for safety reasons. This introduces a potential indication bias and may over-estimate VE especially if this group would have had a lower VE if vaccinated. However, the vast majority of Veterans were diagnosed with HIV after separation, which would not have affected the decision to vaccinate. Our cohort included Veterans and current military personnel who have access to healthcare through the VA and the DoD. As such we are cautious in applying our findings to a general population with different risk characteristics, healthcare care seeking behavior and health care access profiles. Finally, residual confounding factors such a history of pediatric smallpox vaccination in a small proportion of older study participants, for which we have not fully accounted, could potentially affect the accuracy of the VE estimates.

## **Conclusions**

The re-emergence of mpox poses a threat to populations everywhere. In combination with other public health interventions, smallpox vaccines can reduce the spread of mpox virus. Evaluating

the effectiveness of smallpox vaccines against mpox is essential, while also ensuring that all who can potentially benefit from them have equitable access globally.

## 2. Study Plan and Design - Effectiveness of ACAM2000® and DRYVAX® for Preventing Monkeypox among the VA and DoD population

### a) Rationale

Over 40,000 cases of Monkeypox have across the United States in recent months. Two vaccines have been used for the prevention of monkeypox, ACAM2000 (2<sup>nd</sup> generation smallpox vaccine) and JYNNEOS (3<sup>rd</sup> generation smallpox vaccine). The most frequently cited data regarding the effectiveness of smallpox vaccines against monkeypox is from a retrospective analysis published in 1988 which examined whether smallpox vaccination with Dryvax (1<sup>st</sup> generation smallpox vaccine) could also prevent mpox and reported an effectiveness of 85% against monkeypox among 338 patients in the Democratic Republic of Congo. However, there are limited data currently available on the clinical efficacy or effectiveness of older generation vaccines DRYVAX and ACAM2000 in the current outbreak. Additionally, it is unclear how much the effectiveness of vaccination wanes over time or whether boosting previously vaccinated individuals is beneficial.

b) Hypothesis – We hypothesized that prior vaccination with a smallpox vaccine is protective against mpox disease.

### c) Study population

The VA provides care to nearly 9 million Veterans at 171 medical centers and 1112 outpatient clinics across the US and has been instrumental in providing information regarding real-world vaccine effectiveness during the COVID-19 pandemic. In 1972, routine smallpox vaccination was discontinued after the disease was eradicated in the United States. In 2021, nearly 73% of Veterans were at least 50 years old and eligible to have been vaccinated in childhood. More than 2.6 million service members received the ACAM2000 smallpox vaccine between 2002 and 2017 as a pre-deployment requirement or for occupational reasons. Most of these individuals have since become Veterans. About 60% of all Veterans have used a Veterans Health Administration (VHA) health care center, representing a substantial population of individuals who may have

received the ACAM2000 vaccine in this millennium. Since the mpox outbreak began in the U.S., individuals with perceived risk of infection have obtained either the ACAM2000 or JYNNEOS vaccine through local departments of health. Using a combined cohort of active military service men within the DoD and VHA provides an opportunity to estimate the effectiveness of prior smallpox vaccination against mpox in ongoing outbreaks of the disease.

#### d) Study design and statistical analysis plan

We conducted a retrospective observational test-negative case-control evaluation of vaccine effectiveness by comparing the odds of antecedent vaccination in cases (individuals with PCR-test confirmed mpox) vs. control (test-negative individuals without mpox). Cases patients were selected based on positive results for non-variola Orthopoxvirus generic real-time PCR testing. All study participants were drawn from individuals with ‘Medically attended’ symptoms) of mpox defined as persons who sought medical attention for or were identified by a clinician as having clinical syndromes concerning for mpox and underwent orthopoxvirus testing as part of a diagnostic evaluation within the DoD or the VHA healthcare systems.

ACAM2000 and Dryvax administration was captured using VA and DoD immunization records. Everyone included in the study population was vaccinated by the military and in conjunction with military service. The individuals included in the VA population enrolled in the VHA post active duty and had their follow-up here . We have included this in the description of the study population. We excluded individuals with remote smallpox vaccination (e.g., pediatric age) which we could not verify using DoD or VHA health records.

Other covariates included age, race/ethnicity, comorbidities, time since vaccination, HIV diagnosis and CD4 recovery, and plasma HIV RNA viral load suppression. We conducted a retrospective analysis comparing the rate of vaccination among test positive individuals and test negative controls in the combined VHA/DoD cohort and estimated rates of monkeypox by vaccine type received for the following sub-categories

- a. in VA/DoD population overall and in each sub-population separately
- b. among monkeypox cases overall
- c. among mpox negative controls overall

- d. among people with HIV overall
- e. monkeypox cases with HIV
- f. monkeypox negative controls with HIV

We determined the odds of vaccination among cases compared with controls and calculated vaccine effectiveness estimates ( $1 - \text{OR of mpox in vaccinated} / \text{OR of mpox in unvaccinated} \times 100\%$ ) adjusting for covariates including age, race/ethnicity, and HIV status.

### 3. Supplementary Tables

**Supplementary Table S1: Demographic and clinical characteristics of individuals tested for Non-variola *Orthopoxvirus* (NVO) across DoD and VHA (July 1 – October 31, 2022)**

|                     |                      | Total |      | Negative for NVO |     | Positive NVO |     |
|---------------------|----------------------|-------|------|------------------|-----|--------------|-----|
|                     |                      | N     | %    | N                | %   | N            | %   |
| <b>Population</b>   |                      | 1,007 | 100% | 709              | 70% | 298          | 30% |
| <b>Age</b>          | Median               | 43    |      | 49               |     | 37           |     |
| <b>Age</b>          |                      |       |      |                  |     |              |     |
|                     | Age 18-34            | 308   | 31%  | 182              | 26% | 126          | 42% |
|                     | Age 35-44            | 216   | 21%  | 136              | 19% | 80           | 27% |
|                     | Age 45-64            | 339   | 34%  | 252              | 36% | 87           | 29% |
|                     | Age 65+              | 144   | 14%  | s                | s   | s            | s   |
| <b>Sex</b>          |                      |       |      |                  |     |              |     |
|                     | Female               | 77    | 8%   | s                | s   | s            | s   |
|                     | Male                 | 930   | 92%  | 635              | 90% | 295          | 99% |
| <b>Race</b>         |                      |       |      |                  |     |              |     |
|                     | Black                | 410   | 41%  | 268              | 38% | 142          | 48% |
|                     | Hispanic             | 123   | 12%  | 82               | 12% | 41           | 14% |
|                     | White                | 376   | 37%  | 283              | 40% | 93           | 31% |
|                     | Other or unknown     | 98    | 10%  | 76               | 11% | 22           | 7%  |
| <b>Data source</b>  |                      |       |      |                  |     |              |     |
|                     | DoD data             | 209   | 21%  | 102              | 14% | 107          | 36% |
|                     | VHA data             | 798   | 79%  | 607              | 86% | 191          | 64% |
| <b>Group</b>        |                      |       |      |                  |     |              |     |
|                     | DoD (service member) | 198   | 20%  | 97               | 14% | 101          | 34% |
|                     | DoD (Veteran)        | 11    | 1%   | s                | s   | s            | s   |
|                     | VHA (Veteran)        | 798   | 79%  | 607              | 86% | 191          | 64% |
| <b>Vaccinated</b>   |                      |       |      |                  |     |              |     |
|                     | No                   | 799   | 79%  | 540              | 76% | 259          | 87% |
|                     | Yes                  | 208   | 21%  | 169              | 24% | 39           | 13% |
| <b>Vaccine type</b> |                      |       |      |                  |     |              |     |
|                     | None                 | 799   | 79%  | 540              | 76% | 259          | 87% |



|                                                                                   |          |     |     |     |     |     |     |
|-----------------------------------------------------------------------------------|----------|-----|-----|-----|-----|-----|-----|
|                                                                                   | ACAM2000 | 125 | 60% | 101 | 60% | 24  | 62% |
|                                                                                   | Dryvax   | 83  | 40% | 68  | 40% | 15  | 38% |
| <b>Number of ACAM shots</b>                                                       |          |     |     |     |     |     |     |
|                                                                                   | 0        | 882 | 88% | 608 | 86% | 274 | 92% |
|                                                                                   | 1        | 117 | 12% | 96  | 14% | 21  | 7%  |
|                                                                                   | 2        | s   | s   | s   | s   | s   | s   |
|                                                                                   | 3+       | -   | 0%  | -   | 0%  | -   | 0%  |
| <b>Number of Dryvax shots</b>                                                     |          |     |     |     |     |     |     |
|                                                                                   | 0        | 915 | 91% | 633 | 89% | 282 | 95% |
|                                                                                   | 1        | 75  | 7%  | 64  | 9%  | 11  | 4%  |
|                                                                                   | 2        | 11  | 1%  | s   | s   | s   | s   |
|                                                                                   | 3+       | s   | s   | s   | s   | s   | s   |
| <b>Both vaccine types (People with at least one ACAM and at least one Dryvax)</b> |          | s   | s   | s   | s   | s   | s   |
| <b>Number of shots</b>                                                            |          |     |     |     |     |     |     |
|                                                                                   | 0        | 799 | 79% | 540 | 76% | 259 | 87% |
|                                                                                   | 1        | 178 | 18% | 148 | 21% | 30  | 10% |
|                                                                                   | 2+       | 30  | 3%  | s   | s   | s   | s   |
| <b>Years since vaccination</b>                                                    |          |     |     |     |     |     |     |
|                                                                                   | None     | 799 | 79% | 540 | 76% | 259 | 87% |
|                                                                                   | 0 to 4   | 18  | 9%  | s   | s   | s   | s   |
|                                                                                   | 5 to 10  | 37  | 18% | s   | s   | s   | s   |
|                                                                                   | 11 to 15 | 92  | 44% | 74  | 44% | 18  | 46% |
|                                                                                   | 16+      | 61  | 29% | s   | s   | s   | s   |
| <b>Diagnosed with HIV</b>                                                         |          |     |     |     |     |     |     |
|                                                                                   | No       | 712 | 71% | 545 | 77% | 167 | 56% |
|                                                                                   | Yes      | 295 | 29% | 164 | 23% | 131 | 44% |
| <b>Incident hospitalization</b>                                                   |          |     |     |     |     |     |     |
|                                                                                   | Missing  | 209 | 21% | 102 | 14% | 107 | 36% |
|                                                                                   | No       | 780 | 77% | 603 | 85% | 177 | 59% |
|                                                                                   | Yes      | 18  | 2%  | s   | s   | s   | s   |

S = suppressed (– we followed the Medicare rules for data suppression for VHA and DoD datasets)

**Supplementary Table S2: Vaccination status of study population by vaccine type, number of doses and years since vaccination -DoD and VHA (July 1 – October 31, 2022)**

|                                                               |           | TOTAL |        | DoD |       | VHA |       |
|---------------------------------------------------------------|-----------|-------|--------|-----|-------|-----|-------|
|                                                               |           | N     | %      | N   | %     | N   | %     |
| <b>Population</b>                                             |           | 1,007 | 100.0% | 209 | 20.8% | 798 | 79.2% |
| <b>Vaccinated</b>                                             |           |       |        |     |       |     |       |
|                                                               | No        | 799   | 79.3%  | 170 | 81.3% | 629 | 78.8% |
|                                                               | Yes       | 208   | 20.7%  | 39  | 18.7% | 169 | 21.2% |
| <b>Vaccine type</b>                                           |           |       |        |     |       |     |       |
|                                                               | None      | 799   | 79.3%  | 170 | 81.3% | 629 | 78.8% |
|                                                               | ACAM2000  | 125   | 60.1%  | 30  | 76.9% | 95  | 56.2% |
|                                                               | Dryvax    | 83    | 39.9%  | s   | s     | s   | s     |
| <b>Number of ACAM2000 doses</b>                               |           |       |        |     |       |     |       |
|                                                               | 0         | 882   | 87.6%  | 179 | 85.6% | 703 | 88.1% |
|                                                               | 1         | 117   | 11.6%  | 30  | 14.4% | 87  | 10.9% |
|                                                               | 2         | s     | s      | s   | s     | s   | s     |
|                                                               | 3 or more | -     | 0.0%   | -   | 0.0%  | -   | 0.0%  |
| <b>Number of Dryvax doses</b>                                 |           |       |        |     |       |     |       |
|                                                               | 0         | 915   | 90.9%  | 198 | 94.7% | 717 | 89.8% |
|                                                               | 1         | 75    | 7.4%   | 10  | 4.8%  | 65  | 8.1%  |
|                                                               | 2         | 11    | 1.1%   | s   | s     | s   | s     |
|                                                               | 3 or more | s     | s      | s   | s     | s   | s     |
| <b>Number of overall vaccine doses regardless of sub-type</b> |           |       |        |     |       |     |       |
|                                                               | 0         | 799   | 79.3%  | 170 | 81.3% | 629 | 78.8% |
|                                                               | 1         | 178   | 17.7%  | 37  | 17.7% | 141 | 17.7% |
|                                                               | 2 or more | 30    | 3.0%   | s   | s     | s   | s     |
| <b>Years since vaccination</b>                                |           |       |        |     |       |     |       |
|                                                               | (none)    | 799   | 79.3%  | 170 | 81.3% | 629 | 78.8% |
|                                                               | 0 to 4    | 18    | 8.7%   | s   | s     | s   | s     |
|                                                               | 5 to 10   | 37    | 17.8%  | 12  | 30.8% | 25  | 14.8% |

|  |          |    |       |    |       |    |       |
|--|----------|----|-------|----|-------|----|-------|
|  | 11 to 15 | 92 | 44.2% | 13 | 33.3% | 79 | 46.7% |
|  | 16+      | 61 | 29.3% | s  | s     | s  | s     |

**S = suppressed** (– we followed the Medicare rules for data suppression for VHA and DoD datasets)

**Supplementary Table S3: Regression models and outputs**

**Supplementary Table S3 – Fit of regression models**

| <b>Model</b> | <b>Subpopulation</b>                                  | <b>Criterion</b> | <b>Intercept Only</b> | <b>Intercept and Covariates</b> | <b>Included in model</b> |
|--------------|-------------------------------------------------------|------------------|-----------------------|---------------------------------|--------------------------|
| <b>1</b>     | <b>Hospitalized - tested positive (VHA data only)</b> | AIC              | 102.12                | 107.09                          | Vaccinated, age, race    |
|              |                                                       | SC               | 105.37                | 123.35                          |                          |
|              |                                                       | -2 Log L         | 100.12                | 97.09                           |                          |
| <b>2</b>     | <b>Full population</b>                                | AIC              | 1225.25               | 1211.43                         | Vaccinated               |
|              |                                                       | SC               | 1230.17               | 1221.26                         | Vaccinated               |
|              |                                                       | -2 Log L         | 1223.25               | 1207.43                         | Vaccinated               |
| <b>3</b>     | <b>Female</b>                                         | AIC              | 27.35                 | 28.02                           | Vaccinated               |
|              |                                                       | SC               | 29.70                 | 32.71                           | Vaccinated               |
|              |                                                       | -2 Log L         | 25.35                 | 24.02                           | Vaccinated               |
| <b>4</b>     | <b>Male</b>                                           | AIC              | 1164.02               | 1150.16                         | Vaccinated               |
|              |                                                       | SC               | 1168.86               | 1159.83                         | Vaccinated               |
|              |                                                       | -2 Log L         | 1162.02               | 1146.16                         | Vaccinated               |
| <b>5</b>     | <b>Race - Black</b>                                   | AIC              | 531.02                | 528.09                          | Vaccinated               |
|              |                                                       | SC               | 535.04                | 536.13                          | Vaccinated               |
|              |                                                       | -2 Log L         | 529.02                | 524.09                          | Vaccinated               |
| <b>6</b>     | <b>Race - Hispanic</b>                                | AIC              | 158.58                | 156.95                          | Vaccinated               |
|              |                                                       | SC               | 161.39                | 162.58                          | Vaccinated               |
|              |                                                       | -2 Log L         | 156.58                | 152.95                          | Vaccinated               |
| <b>7</b>     | <b>Race - White</b>                                   | AIC              | 422.66                | 421.64                          | Vaccinated               |
|              |                                                       | SC               | 426.59                | 429.50                          | Vaccinated               |

|           |                                    |          |         |         |                                                                 |
|-----------|------------------------------------|----------|---------|---------|-----------------------------------------------------------------|
|           |                                    | -2 Log L | 420.66  | 417.64  | Vaccinated                                                      |
| <b>8</b>  | <b>Race - Other/Unknown</b>        | AIC      | 106.38  | 101.73  | Vaccinated                                                      |
|           |                                    | SC       | 108.96  | 106.90  | Vaccinated                                                      |
|           |                                    | -2 Log L | 104.38  | 97.73   | Vaccinated                                                      |
| <b>9</b>  | <b>Not diagnosed with HIV</b>      | AIC      | 777.68  | 766.78  | Vaccinated                                                      |
|           |                                    | SC       | 782.24  | 775.91  | Vaccinated                                                      |
|           |                                    | -2 Log L | 775.68  | 762.78  | Vaccinated                                                      |
| <b>10</b> | <b>HIV positive</b>                | AIC      | 407.26  | 406.55  | Vaccinated                                                      |
|           |                                    | SC       | 410.94  | 413.92  | Vaccinated                                                      |
|           |                                    | -2 Log L | 405.26  | 402.55  | Vaccinated                                                      |
| <b>11</b> | <b>Full population</b>             | AIC      | 1225.25 | 1012.68 | Vaccination type, age, race, diagnosed with HIV, male, DoD data |
|           |                                    | SC       | 1230.17 | 1071.66 |                                                                 |
|           |                                    | -2 Log L | 1223.25 | 988.68  |                                                                 |
| <b>12</b> | <b>Vaccination type</b>            | AIC      | 1225.25 | 1213.39 | Vaccination type                                                |
|           |                                    | SC       | 1230.17 | 1228.13 |                                                                 |
|           |                                    | -2 Log L | 1223.25 | 1207.39 |                                                                 |
| <b>13</b> | <b>Age</b>                         | AIC      | 1225.25 | 1139.05 | Age                                                             |
|           |                                    | SC       | 1230.17 | 1158.71 |                                                                 |
|           |                                    | -2 Log L | 1223.25 | 1131.05 |                                                                 |
| <b>14</b> | <b>Race</b>                        | AIC      | 1225.25 | 1218.65 | Race                                                            |
|           |                                    | SC       | 1230.17 | 1238.31 |                                                                 |
|           |                                    | -2 Log L | 1223.25 | 1210.65 |                                                                 |
| <b>15</b> | <b>Diagnosed with HIV (yes/no)</b> | AIC      | 1225.25 | 1184.93 | Diagnosed with HIV                                              |
|           |                                    | SC       | 1230.17 | 1194.76 |                                                                 |
|           |                                    | -2 Log L | 1223.25 | 1180.93 |                                                                 |
| <b>16</b> | <b>Male</b>                        | AIC      | 1225.25 | 1191.38 | Male                                                            |
|           |                                    | SC       | 1230.17 | 1201.21 |                                                                 |
|           |                                    | -2 Log L | 1223.25 | 1187.38 |                                                                 |
| <b>17</b> | <b>Under 65</b>                    | AIC      | 1107.87 | 966.94  | Vaccination type, age, race, diagnosed with HIV, male, DoD data |

|           |                                     |          |         |         |                                                         |
|-----------|-------------------------------------|----------|---------|---------|---------------------------------------------------------|
|           |                                     | SC       | 1112.63 | 1019.30 |                                                         |
|           |                                     | -2 Log L | 1105.87 | 944.94  |                                                         |
| <b>18</b> | <b>HIV positive</b>                 | AIC      | 407.26  | 380.12  | Vaccinated, age, race, DoD data                         |
|           |                                     | SC       | 410.94  | 409.62  |                                                         |
|           |                                     | -2 Log L | 405.26  | 364.12  |                                                         |
| <b>19</b> | <b>Not diagnosed with HIV</b>       | AIC      | 777.68  | 640.44  | Vaccinated, age, race, DoD data                         |
|           |                                     | SC       | 782.24  | 681.55  |                                                         |
|           |                                     | -2 Log L | 775.68  | 622.44  |                                                         |
| <b>20</b> | <b>Vaccinees</b>                    | AIC      | 202.75  | 192.45  | Diagnosed with HIV, age, race, DoD data                 |
|           |                                     | SC       | 206.09  | 219.15  |                                                         |
|           |                                     | -2 Log L | 200.75  | 176.45  |                                                         |
| <b>21</b> | <b>0-5 years since vaccination</b>  | AIC      | 1030.19 | 844.44  | Vaccinated, diagnosed with HIV, age, race, male, is DoD |
|           |                                     | SC       | 1034.90 | 891.53  |                                                         |
|           |                                     | -2 Log L | 1028.19 | 824.44  |                                                         |
| <b>22</b> | <b>0-5 years since vaccination</b>  | AIC      | 1030.19 | 1030.70 | Vaccinated                                              |
|           |                                     | SC       | 1034.90 | 1040.11 |                                                         |
|           |                                     | -2 Log L | 1028.19 | 1026.70 |                                                         |
| <b>23</b> | <b>6-10 years since vaccination</b> | AIC      | 1046.29 | 851.94  | Vaccinated, diagnosed with HIV, age, race, male, is DoD |
|           |                                     | SC       | 1051.01 | 899.20  |                                                         |
|           |                                     | -2 Log L | 1044.29 | 831.94  |                                                         |
| <b>24</b> | <b>6-10 years since vaccination</b> | AIC      | 1046.29 | 1045.71 | Vaccinated                                              |
|           |                                     | SC       | 1051.01 | 1055.16 |                                                         |
|           |                                     | -2 Log L | 1044.29 | 1041.71 |                                                         |
| <b>25</b> | <b>11+ years since vaccination</b>  | AIC      | 1082.14 | 887.32  | Vaccinated, diagnosed with HIV, age, race, male, is DoD |
|           |                                     | SC       | 1086.90 | 935.00  |                                                         |
|           |                                     | -2 Log L | 1080.14 | 867.32  |                                                         |
| <b>26</b> | <b>11+ years since vaccination</b>  | AIC      | 1082.14 | 1077.87 | Vaccinated                                              |
|           |                                     | SC       | 1086.90 | 1087.41 |                                                         |

|  |  |          |         |         |  |
|--|--|----------|---------|---------|--|
|  |  | -2 Log L | 1080.14 | 1073.87 |  |
|--|--|----------|---------|---------|--|

These contingency tables with estimated VE for each population (DoD and VA) are now included in the supplementary material.

|                  | DoD      |          |       |
|------------------|----------|----------|-------|
|                  | OPXV PCR |          |       |
| Smallpox vaccine | Positive | Negative | Total |
| Yes              |          |          | 39    |
| No               |          |          | 170   |
| Total            | 107      | 102      | 209   |

DoD - OR = xxx ; VE estimate = xxx

|                  | VHA      |          |       |
|------------------|----------|----------|-------|
|                  | OPXV PCR |          |       |
| Smallpox vaccine | Positive | Negative | Total |
| Yes              |          |          | 169   |
| No               |          |          | 629   |
| Total            | 191      | 607      | 798   |

VHA – OR = xxx; VE estimate =

## 4. Supplementary Figures

### Figure S1: Assessment of Model Fit using Hosmer-Lemeshow Method

Hosmer-Lemeshow  $\chi^2(8) = 11.10$

Prob >  $\chi^2 = 0.1961$  (good fit)

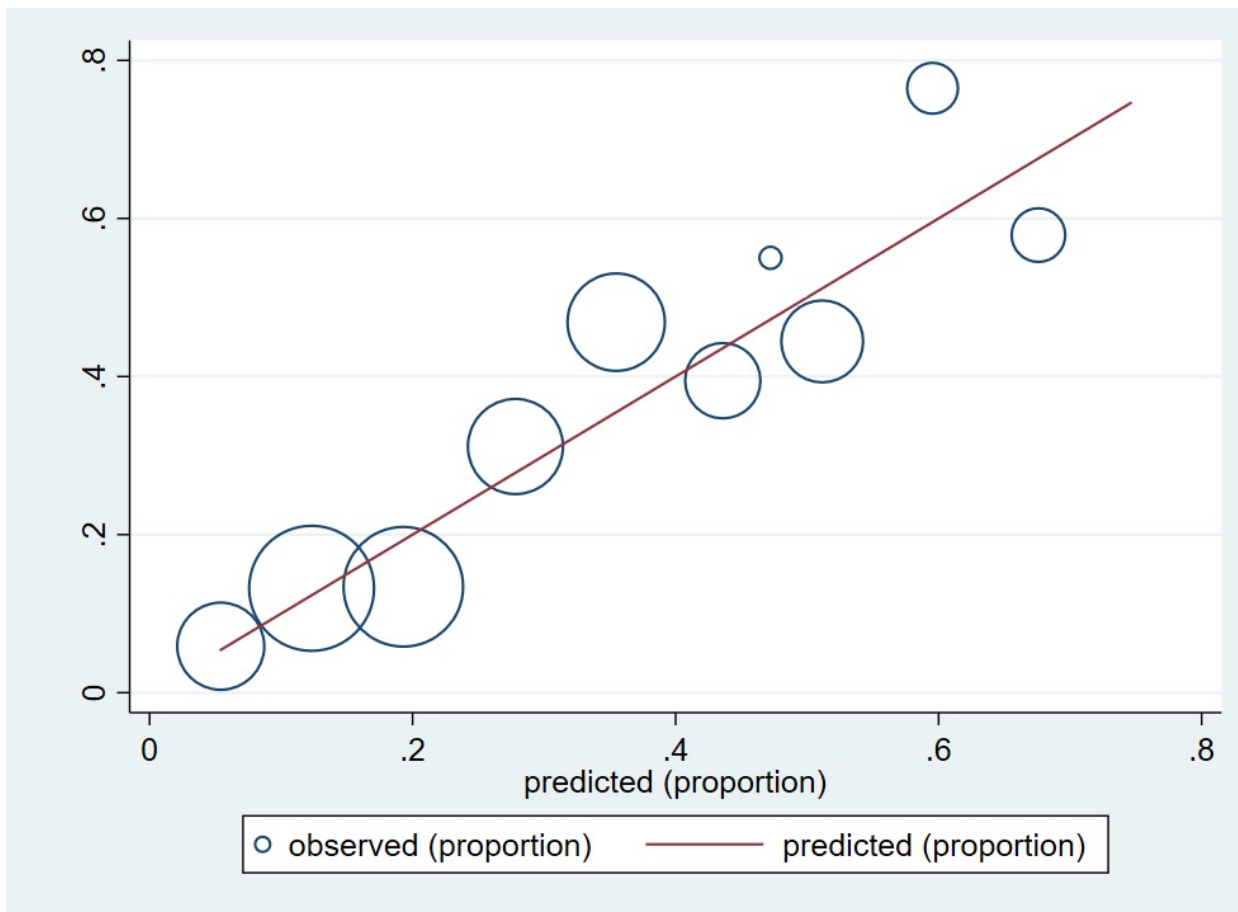

## 5. References

1. Jezek Z, Szczeniowski M, Paluku KM, Mutombo M. Human monkeypox: clinical features of 282 patients. *J Infect Dis.* 1987;156(2):293-8.
2. Jezek Z, Grab B, Szczeniowski MV, Paluku KM, Mutombo M. Human monkeypox: secondary attack rates. *Bull World Health Organ.* 1988;66(4):465-70.
3. CDC. Sexually Transmitted Disease Surveillance 2020 2021 [Available from: <https://www.cdc.gov/std/statistics/2020/default.htm>].
4. CDC. Monkeypox vaccination - Interim guidance 2022 [Available from: <https://www.cdc.gov/poxvirus/monkeypox/interim-considerations/acam2000-vaccine.html>].
5. Philpott D, Hughes CM, Alroy KA, Kerins JL, Pavlick J, Asbel L, et al. Epidemiologic and Clinical Characteristics of Monkeypox Cases - United States, May 17-July 22, 2022. *MMWR Morb Mortal Wkly Rep.* 2022;71(32):1018-22.
